# Supplementary material for: Potential Impact of Rapid Multiplex PCR on Antimicrobial Therapy Guidance for Ventilated Hospital-Acquired Pneumonia in Critically Ill Patients, A Prospective Observational Clinical and Economic Study
Source: PubMed Central journal article supplement (PMC9043525; doi:10.3389/fcimb.2022.804611), 2022-04-13
Supplement: DataSheet_1.pdf [file DataSheet_1.pdf]

# Potential impact of Rapid Multiplex PCR on antimicrobial therapy guidance for ventilated hospital-acquired pneumonia in critically ill patients, a prospective observational clinical and economic study

Florian Guillotin, Cécile Poulain, Benjamin Gaborit, Marwan Bouras, Raphael Cinotti, Karim Lakhal, Mickael Vourc'h, Bertrand Rozec, Karim Asehnoune, Marie-Anne Vibet, Valéry-Pierre Riche, Sophie Gibaud, Lise Crémet, Antoine Roquilly

## *Supplementary Material*

|                                                                                                                                                                                                                                                                                                |          |
|------------------------------------------------------------------------------------------------------------------------------------------------------------------------------------------------------------------------------------------------------------------------------------------------|----------|
| <b>Figure S1. FAPP results compared to culture results for bacterial detection.....</b>                                                                                                                                                                                                        | <b>2</b> |
| <b>Figure S2: Sankey chart of real-life empirical treatments implemented without PCR (left column), antimicrobial therapies simulated with the results of PCR (Middle column), and antimicrobial therapies simulated by following the actuals international guidelines (right column).....</b> | <b>3</b> |
| <b>Table S1: Antimicrobial stewardship developed to guide therapy on the basis of FAPP result.....</b>                                                                                                                                                                                         | <b>5</b> |
| <b>Table S2: Subgroup analysis of the primary outcome.....</b>                                                                                                                                                                                                                                 | <b>6</b> |

**Figure S1. FAPP results compared to culture results for bacterial detection**

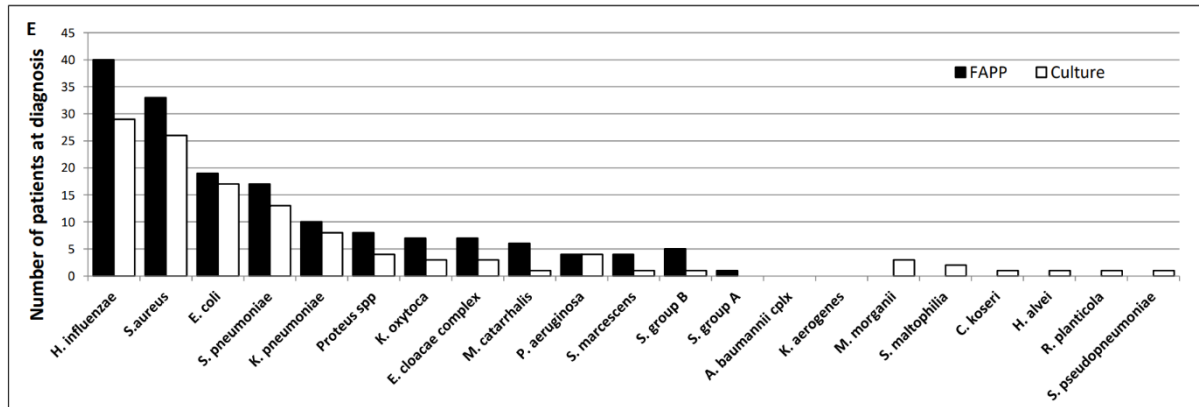

FAPP FilmArray® Pneumonia plus Panel

**Figure S2: Sankey chart of real-life empirical treatments implemented without PCR (left column), antimicrobial therapies simulated with the results of PCR (Middle column), and antimicrobial therapies simulated by following the actuals international guidelines (right column).**

The lines are colored in red for antibiotic escalation, green for de-escalation and yellow for no changes.

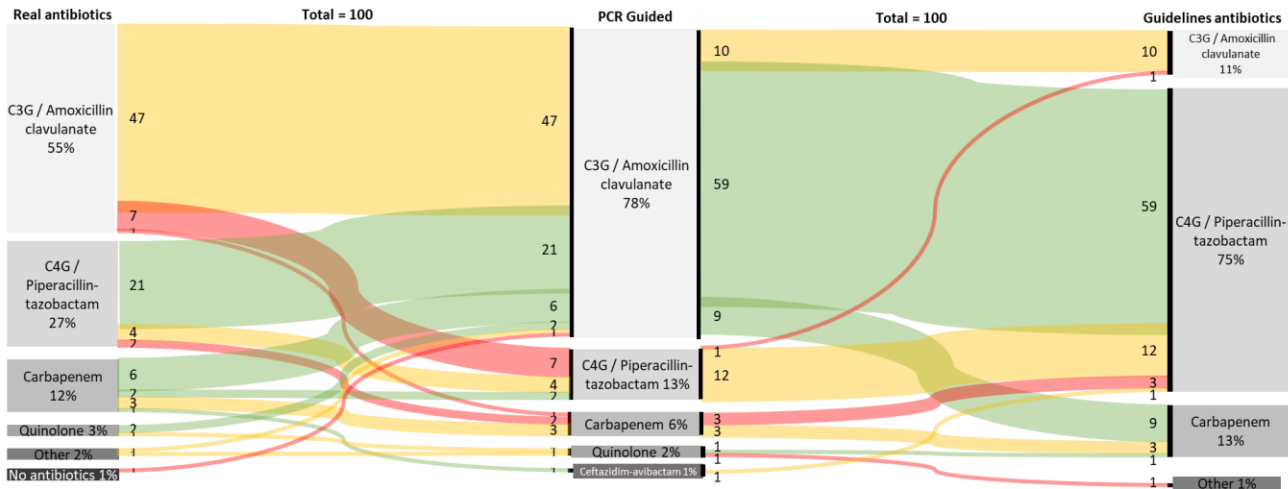

PCR guided: *FilmArray® Pneumonia plus Panel*-guided

**Table S1: Antimicrobial stewardship developed to guide therapy on the basis of FAPP results.**

| Multiplex PCR results                                    |                                                                                 | Empiric antibiotherapy recommended                                                                                                                |
|----------------------------------------------------------|---------------------------------------------------------------------------------|---------------------------------------------------------------------------------------------------------------------------------------------------|
| Positive for Antimicrobial resistance gene               | <b>mecA/C and MREJ</b> (Methicillin resistance)                                 | Linezolid or Vancomycin                                                                                                                           |
|                                                          | <b>CTX-M (ESBL)</b>                                                             | Meropenem or Imipenem                                                                                                                             |
|                                                          | <b>KPC, Oxa48-like*</b> (Carbapenemases)                                        | Ceftazidime-Avibactam + Colistine                                                                                                                 |
|                                                          | <b>NDM, VIM, IMP*</b> (Carbapenemases)                                          | Meropenem or Imipenem + Colistine<br>or<br>Cefzazidime-Avibactam + Aztreonam                                                                      |
| Potentially difficult to treat bacteria                  | <i>A.baumannii</i>                                                              | Meropenem or Imipenem or Ceftazidime                                                                                                              |
|                                                          | <i>E. cloacae</i>                                                               | Cefepime                                                                                                                                          |
|                                                          | <i>K. aerogenes</i>                                                             | Cefepime                                                                                                                                          |
|                                                          | <i>S. marcescens</i>                                                            | Cefepime                                                                                                                                          |
|                                                          | <i>P. aeruginosa</i>                                                            | Meropenem or Imipenem or Ceftazidime                                                                                                              |
| Intracellular bacteria                                   | <i>L. pneumophila</i>                                                           | Spiramycin + Levofloxacin                                                                                                                         |
|                                                          | <i>C. pneumoniae</i>                                                            | Spiramycin                                                                                                                                        |
|                                                          | <i>M. pneumoniae</i>                                                            | Spiramycin                                                                                                                                        |
| Viruses                                                  | <i>Influenza A/B</i>                                                            | Oseltamivir + amoxicillin/clavulanic acid                                                                                                         |
|                                                          | <b>Others</b>                                                                   | Nothing                                                                                                                                           |
| Positive for others                                      | <i>Proteus sp</i>                                                               | Amoxicillin/clavulanic acid                                                                                                                       |
|                                                          | <i>K. pneumoniae</i>                                                            | Third generation cephalosporin                                                                                                                    |
|                                                          | <i>K. oxytoca</i>                                                               | Third generation cephalosporin                                                                                                                    |
|                                                          | <i>E. coli</i>                                                                  | Third generation cephalosporin                                                                                                                    |
|                                                          | <i>H. influenzae</i>                                                            | Third generation cephalosporin                                                                                                                    |
|                                                          | <i>M. catarrhalis</i>                                                           | Amoxicillin/clavulanic acid                                                                                                                       |
|                                                          | <i>S. aureus</i>                                                                | Amoxicillin/clavulanic acid                                                                                                                       |
|                                                          | <i>S. group A or B</i>                                                          | Amoxicillin/clavulanic acid<br>(amoxicillin if no other bacteria is identified)                                                                   |
| <i>S. pneumoniae</i>                                     | Amoxicillin/clavulanic acid<br>(amoxicillin if no other bacteria is identified) |                                                                                                                                                   |
| Negative for all bacteria and resistance genes tested ** |                                                                                 | Consider Gram stain examination :<br>- Nothing:<br>Amoxicillin/clavulanic acid<br>- Gram-negative bacilli :<br>consider <i>S .maltophilia, M.</i> |

In association, in case of **septic shock or after prior exposure to broad-spectrum beta-lactams** (cefepime, carbapenems) in case of potentially **difficult to treat bacteria**

|  |                                                   |  |
|--|---------------------------------------------------|--|
|  | <i>morganii, C. freundii, C. koseri, H. alvei</i> |  |
|--|---------------------------------------------------|--|

\* Call the infectious team and test for Colistine, Tigecycline and Fosfomycine

\*\* **Call the infectious team**

**Table S2: Subgroup analysis of the primary outcome**

| Subgroups               | FAPP based treatment | Recommendations-based treatment |                     |          | Real-life treatment |                     |          |
|-------------------------|----------------------|---------------------------------|---------------------|----------|---------------------|---------------------|----------|
|                         |                      |                                 | difference with PCR | p Values | days                | difference with PCR | p Values |
| Trauma (n=42)           |                      |                                 |                     |          |                     |                     |          |
| Broad spectrum, yes     | 36%                  | 33%                             |                     |          | 22%                 |                     |          |
| Broad spectrum, days    | 0 [0, 0]             | 2[2, 3]                         | 2[0, 2]             | < 0.0001 | 0[0, 6]             | 0[0, 2]             | 0.003    |
| Medical (n=32)          |                      |                                 |                     |          |                     |                     |          |
| Broad spectrum, yes     | 15%                  | 37%                             |                     |          | 24%                 |                     |          |
| Broad spectrum, days    | 0 [0, 2]             | 0 [0, 0]                        | 3 [2, 4]            | < 0.0001 | 3 [0, 7]            | 0 [0, 0]            | < 0.0001 |
| Surgical / Other (n=26) |                      |                                 |                     |          |                     |                     |          |
| Broad spectrum, yes     | 81%                  | 67%                             |                     |          | 70%                 |                     |          |
| Broad spectrum, days    | 1[0, 2]              | 2[2, 3]                         | [-2, 0]             | < 0.002  | 2[0, 5]             | 0[-2, 0]            | 0.01     |

Comparison of the number of days under broad-spectrum. FAPP: FilmArray® Pneumonia plus Panel.
